# Supplementary material for: Aqueous OH-initiated photooxidation of smoke extracts from maize straw and coal combustion: optical character and molecular composition
Source: Copernicus journal article supplement (doi:10.5194/egusphere-2026-39), 2026-02-23
Supplement: Supplementary file [file egusphere-2026-39-AC2-supplement.pdf]

## A letter to reply the comments

**Title:** Aqueous OH-initiated photooxidation of smoke extracts from maize straw and coal combustion: optical character and molecular composition

**Dear editor**

We thank very much for the valuable comments and suggestions from the reviewer, which is of great help to improve the quality of the manuscript. The comments were carefully considered and revisions have been made in response to suggestions. Following is our point-by-point responses to the comments and corresponding revisions.

### *Reviewer #2*

1. While the study presents a thorough analysis using advanced techniques, the mechanistic pathways for molecular transformations, especially the detailed role and interplay of ROS during photooxidation, require better elucidation. The manuscript should provide a more comprehensive discussion of likely chemical pathways and reactions influenced by ROS.

**Response :** We thank the reviewer for this important comment. We agree that the mechanistic pathways underlying molecular transformations, particularly the roles and interplay of different ROS, require a more comprehensive discussion.

In the revised manuscript, we **added Table S5 and S6 to present the top 10 most abundant compounds identified by FT-ICR MS** before photolysis and after 11 h and 23 h photodegradation, together with their DBE values, molecular formulas, inferred functional groups, and FT-ICR MS classifications. Then, a conceptual mechanism summarizing ROS-driven transformation pathways added in **Section 3.6.2**. Additionally, we have refined the conclusion section and supplemented it with a more detailed description of the ROS-driven reaction mechanisms **Line 868-876**: The contributions of ROS to photodegradation followed the order  $\bullet\text{OH} > {}^3\text{C}^* > {}^1\text{O}_2$ , highlighting the dominant role of  $\bullet\text{OH}$  in aqueous-phase processing. Despite these common trends, distinct photochemical pathways were observed. Maize-derived WSOM exhibited more rapid oxidation during the early stage, likely driven by OH-functionalization reactions, whereas coal-derived WSOM showed greater compositional stability. Mechanistically, ROS promoted the conversion of lignin-like aromatics into highly oxygenated products via hydroxylation and ring-opening, while lipid-like compounds undergo functionalization and fragmentation. Secondary reactions with sulfate lead to the formation of organosulfates.

2. The manuscript mentioned transformations in molecular composition (e.g., decrease in aromaticity, increase in aliphatic components) without sufficient mechanistic backing. If the authors can provide more robust connections between analytical observations (e.g., FT-ICR MS results) and established chemical knowledge, it would improve the manuscript's depth.

**Response :** Thanks for this valuable suggestion. We agree that the connections between the observed molecular transformations (e.g., decreases in aromaticity and increases in aliphatic components) and the underlying chemical mechanisms were not sufficiently developed in the original manuscript. In the revised version, we have strengthened the discussion by explicitly linking FT-ICR MS observations (e.g., changes in DBE, AI, MW) to established aqueous-phase oxidation mechanisms. We have strengthened the corresponding analyses in **Section 3.3** (Molecular composition of WSOM via FT-ICR MS), **Section 3.6.2**, and **the Conclusion**, thereby enhancing the overall depth of the manuscript. **Such as in conclusion Line 862-867:** Lignin-like compounds were progressively depleted, accompanied by an increase in lipid- and aliphatic-like species, suggesting the breakdown of conjugated structures and the formation of more saturated, oxygenated products. These transformations reduced chromophoric content through double-bond cleavage and aromatic ring opening, resulting in decreased light absorption and fluorescence.

3. More in-depth reasoning should be provided to explain the observed changes in optical properties (e.g., changes in MAE<sub>365</sub>). Address potential uncertainties regarding how different molecular transformations (e.g., aromatic-to-aliphatic) contribute to these changes.

**Response:** We appreciate the reviewer's suggestion. In revised manuscript, we have strengthened the mechanistic interpretation linking molecular composition to optical properties in **Section 3.2.1 Line 329-336**. Specifically, our results indicate that lignin-like compounds, which are abundant in CHO and CHON classes in fresh maize smoke WSOM, are typically enriched in aromatic rings and  $\pi$ -conjugated structures that act as major chromophores responsible for near-UV light absorption. **Line 330-336:** The observed decrease in lignin-like fractions, together with reductions in DBE and AI values, suggests the breakdown of these conjugated systems during aqueous photooxidation, leading to a decline in MAE<sub>365</sub>. Meanwhile, the formation of more saturated compounds (e.g., lipid- and aliphatic-like species) further contributes to the decrease in MAE<sub>365</sub>. In addition, the formation of small oxygenated CHO species (e.g., carboxylic acids or CHO<sub>2</sub><sup>+</sup> fragments from HR-AMS) with negligible absorbance at 365 nm dilutes the overall light-absorbing capacity.

Overall, the observed changes in MAE<sub>365</sub> likely reflect the combined effects of chromophore degradation, formation of weakly absorbing products, and potential generation of new light-absorbing species. The use of bulk parameters such as MAE<sub>365</sub> inherently integrates contributions from complex mixtures, making it challenging to quantitatively apportion the contributions of individual molecular classes. For example, not all CHO and CHON compounds contribute equally to light absorption, as chromophoric properties depend on factors such as conjugation length and functional group substitution.

4. The methods for quantifying ROS, such as  $\bullet$ OH and  $^1\text{O}_2$ , using EPR warrant more detailed explanation. Specific conditions and potential limitations (e.g., resolution, calibration) should be elaborated.

**Response :** We thank the reviewer for this valuable comment. We agree that a more detailed description of the EPR-based quantification of ROS is necessary. In the revised manuscript, we have expanded the Methods section (**Section 2.7 ROS determination based on Electron paramagnetic resonance (EPR)**) to provide detailed information on the EPR measurements. Relevant details were presented in **Line 233-245**: Electron paramagnetic resonance (EPR) spectroscopy (Bruker EMXnano, Germany) was used to detect ROS. 5,5-Dimethyl-1-pyrroline N-oxide (DMPO) and 2,2,6,6-tetramethylpiperidine (TEMP) were used as spin-trapping agents for  $\bullet$ OH and  $^1\text{O}_2$  to identify the DMPO-OH adducts (1:2:2:1) and the TEMPO adducts (1:1:1), respectively (Hu et al., 2025). The 10 mL of aqueous extracts were diluted into 100 mL using deionized water and pH was adjusted at  $5.0 \pm 0.1$  with 0.1 M H<sub>2</sub>SO<sub>4</sub> solutions. Then 100 mM of two spin-trapping agents were added into the 50 mL of acidified aerosol extract solutions. After photodegradation of WSOM extracts, 200  $\mu$ L of solutions were transferred from the reaction solutions and immediately analyzed by EPR. The EPR parameters were set as following: modulation frequency of 100 kHz; center field of 3460 G, modulation amplitude of 1G, microwave power of 25 mW, sweep width of 200 G, sweep time of 150 s, number of scans of 20. **We also added references to support (Wang, J., Wang, S. Reactive species in advanced oxidation processes: Formation, identification and reaction mechanism, Chem. Eng. J., 401,126158, <https://doi.org/10.1016/j.cej.2020.126158>2020).** Additionally, we also admitted the limitation of EPR for ROS quantification in **Line 656-661**: It should be noted that EPR-based spin-trapping methods have inherent limitations. For example, spectral overlap and background signals may affect the resolution and accuracy of peak assignment. Furthermore, certain short-lived or low-reactivity ROS may not be effectively captured by the selected spin traps. Therefore, the reported ROS contributions should be interpreted as semi-quantitative estimates rather than

absolute concentrations.

5. Describe the assumptions and any limitations involved in employing chemical probes like benzoic acid and others for steady-state ROS concentrations. These details are crucial for assessing the robustness and reliability of the results.

**Response:** The second-order reaction rate constant between BA and  $\cdot\text{OH}$  is strongly dependent on pH value. **Line 671-682:** Under low pH conditions, benzoic acid predominantly exists in its molecular form (BA), whereas at high pH it is mainly present as the deprotonated species (benzoate,  $\text{BA}^-$ ). These different forms exhibit distinct reactivity toward  $\cdot\text{OH}$ . According to the literature, when  $\text{pH} > 6$ ,  $\text{BA}^-$  is the dominant species, with a rate constant  $k_{\text{BA}^-, \text{OH}} = 6.0 \times 10^9 \text{ M}^{-1} \text{ s}^{-1}$ ; When  $\text{pH} < 4$ , the molecular form dominates, with  $k_{\text{BA}, \text{OH}} = 1.8 \times 10^9 \text{ M}^{-1} \text{ s}^{-1}$ . For example, BA has a second-order rate constant with OH of  $(5.9 \pm 0.5) \times 10^9 \text{ M}^{-1} \text{ s}^{-1}$  at pH 7 (**Aqueous Phase Photo-oxidation of Brown Carbon Nitrophenols: Reaction Kinetics, Mechanism, and Evolution of Light Absorption, ACS Earth Space Chem. 2018, 2, 225–234**). In this study, the initial pH values of coal and maize samples were 6.79 and 5.83, respectively, which decreased to 5.77 and 5.08 after 23 h of irradiation. Overall, the pH of the solution was between 5–7 throughout the reaction. Therefore, we adopted the literature value  $k_{\text{BA}, \text{OH}} = 5.1 \times 10^9 \text{ M}^{-1} \text{ s}^{-1}$  (Lei et al., 2023) to calculate the steady-state concentration of BA. **The added contents were shown in Line 671-682** in revised manuscript.

6. Clarify whether the  $\text{H}_2\text{O}_2$  concentrations used in the experiments reflect atmospheric conditions or are merely a lab convenience for ensuring sufficient OH radical presence. Discuss the implications of these concentrations on generalizing findings to real-world scenarios.

**Response:** We totally agree with you. In this study,  $\text{H}_2\text{O}_2$  was primarily employed as a controlled precursor to generate sufficient  $\cdot\text{OH}$  radicals within a reasonable experimental timescale, allowing us to systematically investigate the molecular transformation pathways and optical evolution of smoke-derived WSOM. Why we select 10 mM? Firstly, we added experimental results on how different  $\text{H}_2\text{O}_2$  concentration influence the relative importance of ROS. To do this, we examined the ROS concentrations and their contributions under five different  $\text{H}_2\text{O}_2$  levels (0.5, 1, 3, 5, and 10 mM). **The results are presented in Table S5** in revised manuscript. As shown, increasing the  $\text{H}_2\text{O}_2$  dosage leads to higher  $\cdot\text{OH}$  concentrations and its relative contributions. The measured  $\cdot\text{OH}$  concentrations generally fall within a relatively narrow range under five different  $\text{H}_2\text{O}_2$  concentration, with average values of (0.7

$-9.1 \times 10^{-14}$  M and  $(1.3-8.3) \times 10^{-14}$  M, for coal and maize smoke WSOM, respectively. It is at the upper range of OH concentrations in cloud and fog water [1, 2]. We also provided references about H<sub>2</sub>O<sub>2</sub> addition (1 mM, 3 mM and 10 mM) [1, 3].

[1] Rachel F. Hems and Jonathan P. D. Abbatt. Aqueous phase photo-oxidation of brown carbon nitrophenols: Reaction kinetics, mechanism, and evolution of light absorption, ACS Earth Space Chem., 2018, 2, 225-234.

[2] Arakaki T, Anastasio C, Kuroki Y, et al. A general scavenging rate constant for reaction of hydroxyl radical with organic carbon in atmospheric waters, Environ. Sci. Technol., 2013, 47 (15), 8196-8203.

[3] Zhao R, Lee A K Y, Huang L, et al. Photochemical processing of aqueous atmospheric brown carbon, Atmos. Chem. Phys., 2015, 15, 6087-6100.

**Table S5** Concentration and contribution to WSOM photodegradation of each ROS under different H<sub>2</sub>O<sub>2</sub> concentration

| Sample | [H <sub>2</sub> O <sub>2</sub> ]<br>(mM) | [ROS] (M)                                    |                                                                        |                                                           | Contribution ratio (%) |                             |                 |
|--------|------------------------------------------|----------------------------------------------|------------------------------------------------------------------------|-----------------------------------------------------------|------------------------|-----------------------------|-----------------|
|        |                                          | [•OH] <sub>ss</sub><br>( $\times 10^{-14}$ ) | [ <sup>1</sup> O <sub>2</sub> ] <sub>ss</sub><br>( $\times 10^{-13}$ ) | [ <sup>3</sup> C*] <sub>ss</sub><br>( $\times 10^{-13}$ ) | •OH                    | <sup>1</sup> O <sub>2</sub> | <sup>3</sup> C* |
| coal   | 0.5                                      | 0.7                                          | 4.0                                                                    | 1.0                                                       | 25.8                   | 0.5                         | 73.7            |
|        | 1                                        | 1.6                                          | 3.4                                                                    | 1.0                                                       | 46.6                   | 0.3                         | 53.1            |
|        | 3                                        | 5.7                                          | 3.5                                                                    | 2.1                                                       | 58.8                   | 0.1                         | 41.1            |
|        | 5                                        | 8.7                                          | 4.1                                                                    | 2.6                                                       | 63.5                   | 0.1                         | 36.4            |
|        | 10                                       | 9.1                                          | 3.5                                                                    | 9.0                                                       | 86.4                   | 0.8                         | 12.8            |
| maize  | 0.5                                      | 1.3                                          | 9.4                                                                    | 1.2                                                       | 37.2                   | 0.8                         | 62.0            |
|        | 1                                        | 2.2                                          | 8.7                                                                    | 1.8                                                       | 39.3                   | 0.5                         | 60.2            |
|        | 3                                        | 3.8                                          | 2.5                                                                    | 1.3                                                       | 60.9                   | 0.1                         | 39.0            |
|        | 5                                        | 7.3                                          | 7.2                                                                    | 2.3                                                       | 62.2                   | 0.2                         | 37.6            |
|        | 10                                       | 8.6                                          | 0.2                                                                    | 7.1                                                       | 80.9                   | 3.1                         | 16.0            |

7. Although distinct pathways and effects are noted, the comparative analysis between maize and coal smoke extracts needs strengthening. Discuss potential reasons for the observed differences in greater detail, grounded in the composition and typical environmental impacts of each smoke type.

**Response:** We thank the reviewer for this constructive suggestion. We agree that the comparative analysis between maize and coal smoke extracts can be further strengthened by providing a more detailed mechanistic interpretation based on their compositional differences and environmental relevance. At the end of **Section 3.6.2**, a

discussion was added that integrates FT-ICR MS and ROS analyses to elucidate the transformation mechanisms of coal and maize. For example, **Line 812-825**: Next, by integrating FT-ICR MS and ROS analyses, we further compared the molecular transformation mechanisms of the two types of smoke. **Table S6 and S7 list the top 10 most abundant compounds identified by FT-ICR MS before photolysis and after 11 h and 23 h photooxidation**, together with their DBE values, molecular formulas, inferred functional groups, and FT-ICR MS classifications.

**Table S6** The top 10 most abundant compounds identified in coal smoke WSOM by FT-ICR MS

| Samples      | DBE                                            | Formula                                          | Percentage (%)             | Functional groups         | FTIRC-MS category |
|--------------|------------------------------------------------|--------------------------------------------------|----------------------------|---------------------------|-------------------|
| coal<br>0 h  | 0.5                                            | C <sub>12</sub> H <sub>26</sub> O <sub>4</sub> S | 3.44                       | organosulfate             | lipid -like       |
|              | 4.5                                            | C <sub>17</sub> H <sub>28</sub> O <sub>3</sub> S | 2.97                       | organosulfate             | lipid-like        |
|              | 7.5                                            | C <sub>12</sub> H <sub>12</sub> O <sub>5</sub>   | 1.94                       | aromatic compound         | lignin-like       |
|              | 4.5                                            | C <sub>18</sub> H <sub>30</sub> O <sub>3</sub> S | 1.82                       | organosulfate             | lipid -like       |
|              | 4.5                                            | C <sub>16</sub> H <sub>26</sub> O <sub>3</sub> S | 1.32                       | organosulfate             | lipid -like       |
|              | 1.5                                            | C <sub>16</sub> H <sub>32</sub> O <sub>2</sub>   | 1.20                       | fatty acid                | lipid -like       |
|              | 0.5                                            | C <sub>14</sub> H <sub>30</sub> O <sub>5</sub> S | 1.03                       | hydroxy-organosulfate     | lipid -like       |
|              | 1.5                                            | C <sub>18</sub> H <sub>36</sub> O <sub>3</sub>   | 0.99                       | hydroxy fatty acid        | lipid-like        |
|              | 7.5                                            | C <sub>13</sub> H <sub>14</sub> O <sub>5</sub>   | 0.85                       | trimethoxybenzoic acid    | lignin-like       |
|              | 9.5                                            | C <sub>14</sub> H <sub>12</sub> O <sub>6</sub>   | 0.84                       | lignin-like dimer         | lignin-like       |
| coal<br>11 h | 1.5                                            | C <sub>16</sub> H <sub>32</sub> O <sub>2</sub>   | 4.21                       | palmitic acid             | lipid-like        |
|              | 0.5                                            | C <sub>18</sub> H <sub>39</sub> NO <sub>5</sub>  | 2.09                       | hydroxy fatty acid amide  | lipid-like        |
|              | 1.5                                            | C <sub>18</sub> H <sub>36</sub> O <sub>2</sub>   | 1.91                       | octadecanoic acid         | lipid-like        |
|              | 4.5                                            | C <sub>18</sub> H <sub>30</sub> O <sub>3</sub> S | 1.33                       | unsaturated organosulfate | lipid-like        |
|              | 0.5                                            | C <sub>19</sub> H <sub>40</sub> O <sub>6</sub>   | 1.13                       | polyhydroxy nonadecane    | lipid-like        |
|              | 3.5                                            | C <sub>12</sub> H <sub>20</sub> O <sub>3</sub>   | 1.02                       | dodecadienoic acid        | lipid-like        |
|              | 4.5                                            | C <sub>17</sub> H <sub>28</sub> O <sub>3</sub> S | 0.96                       | unsaturated organosulfate | lipid-like        |
|              | 2.5                                            | C <sub>18</sub> H <sub>34</sub> O <sub>3</sub>   | 0.96                       | unsaturated fatty acid    | lipid-like        |
|              | 4.5                                            | C <sub>19</sub> H <sub>32</sub> O <sub>3</sub> S | 0.85                       | unsaturated organosulfate | lipid-like        |
| 1.5          | C <sub>18</sub> H <sub>36</sub> O <sub>3</sub> | 0.81                                             | hydroxyl octadecanoic acid | lipid-like                |                   |
| coal<br>23 h | 0.5                                            | C <sub>16</sub> H <sub>35</sub> NO <sub>2</sub>  | 6.21                       | fatty amide               | lipid-like        |
|              | 4.5                                            | C <sub>14</sub> H <sub>22</sub> O                | 5.80                       | alkyl acetophenone        | lipid -like       |
|              | 1.5                                            | C <sub>16</sub> H <sub>32</sub> O <sub>2</sub>   | 3.41                       | hexadecanoic acid         | lipid -like       |
|              | 0.5                                            | C <sub>18</sub> H <sub>39</sub> NO <sub>3</sub>  | 3.24                       | hydroxy fatty acid amide  | lipid -like       |
|              | 1.5                                            | C <sub>12</sub> H <sub>24</sub> O <sub>2</sub>   | 2.86                       | saturated fatty acid      | lipid -like       |
|              | 0.5                                            | C <sub>18</sub> H <sub>39</sub> NO <sub>4</sub>  | 2.73                       | organic nitrate           | lipid -like       |
|              | 0.5                                            | C <sub>12</sub> H <sub>26</sub> O <sub>4</sub> S | 2.52                       | organosulfate             | lipid -like       |
|              | 0.5                                            | C <sub>20</sub> H <sub>43</sub> NO <sub>5</sub>  | 1.99                       | hydroxy organic nitrate   | lipid-like        |
|              | 5.5                                            | C <sub>17</sub> H <sub>26</sub> O <sub>4</sub>   | 1.91                       | dicarboxylic acids        | lipid-like        |
|              | 1.5                                            | C <sub>18</sub> H <sub>36</sub> O <sub>2</sub>   | 1.74                       | octadecanoic acid         | lipid-like        |

**Table S7** The top 10 most abundant compounds identified in maize smoke WSOM by FT-ICR MS

| Samples       | DBE                                            | Formula                                          | Percentage (%)                      | Functional groups              | FTIRC-MS category  |
|---------------|------------------------------------------------|--------------------------------------------------|-------------------------------------|--------------------------------|--------------------|
| maize<br>0 h  | 5.5                                            | C <sub>9</sub> H <sub>10</sub> O <sub>4</sub>    | 9.56                                | vanillic acid                  | lignin-like        |
|               | 6.5                                            | C <sub>8</sub> H <sub>6</sub> O <sub>4</sub>     | 4.63                                | Phthalic acid                  | lignin-like        |
|               | 5.5                                            | C <sub>10</sub> H <sub>12</sub> O <sub>4</sub>   | 1.62                                | veratric acid                  | lignin-like        |
|               | 5.5                                            | C <sub>7</sub> H <sub>7</sub> NO <sub>4</sub>    | 1.36                                | nitrobenzoic acid              | lignin-like        |
|               | 6.5                                            | C <sub>9</sub> H <sub>8</sub> O <sub>3</sub>     | 1.18                                | hydroxycinnamic acid           | lignin-like        |
|               | 5.5                                            | C <sub>9</sub> H <sub>10</sub> O <sub>3</sub>    | 1.16                                | vanillin                       | lignin-like        |
|               | 10.5                                           | C <sub>18</sub> H <sub>18</sub> O <sub>7</sub>   | 0.81                                | guaiacyl dimer                 | lignin-like        |
|               | 8.5                                            | C <sub>11</sub> H <sub>8</sub> O <sub>3</sub>    | 0.74                                | hydroxyanthraquinone           | condensed aromatic |
|               | 6.5                                            | C <sub>10</sub> H <sub>10</sub> O <sub>4</sub>   | 0.71                                | ferulic acid                   | lignin-like        |
|               | 6.5                                            | C <sub>9</sub> H <sub>8</sub> O <sub>4</sub>     | 0.66                                | polyphenols                    | lignin-like        |
| maize<br>11 h | 4.5                                            | C <sub>14</sub> H <sub>22</sub> O                | 2.63                                | aromatic ketone                | aromatic           |
|               | 1.5                                            | C <sub>16</sub> H <sub>32</sub> O <sub>2</sub>   | 2.58                                | saturated fatty acids          | lipid-like         |
|               | 1.5                                            | C <sub>18</sub> H <sub>36</sub> O <sub>2</sub>   | 2.15                                | saturated fatty acids          | lipid-like         |
|               | 2.5                                            | C <sub>13</sub> H <sub>25</sub> NO <sub>3</sub>  | 2.04                                | n-hydroxytridecanamide         | lipid-like         |
|               | 0.5                                            | C <sub>12</sub> H <sub>26</sub> O <sub>4</sub> S | 1.67                                | alkyl organosulfate            | aliphatic          |
|               | 1.5                                            | C <sub>12</sub> H <sub>24</sub> O <sub>2</sub>   | 1.50                                | lauric acid                    | aliphatic          |
|               | 1.5                                            | C <sub>9</sub> H <sub>18</sub> O <sub>6</sub>    | 1.18                                | polyhydroxy nonanoic acid      | carbohydrate       |
|               | 5.5                                            | C <sub>9</sub> H <sub>10</sub> O <sub>7</sub>    | 0.96                                | hydroxyphthalic acid           | tannin-like        |
|               | 2.5                                            | C <sub>18</sub> H <sub>34</sub> O <sub>3</sub>   | 0.75                                | hydroxy unsaturated fatty acid | lipid-like         |
| 3.5           | C <sub>17</sub> H <sub>30</sub> O <sub>5</sub> | 0.74                                             | polyhydroxy unsaturated fatty acids | lipid-like                     |                    |
| maize<br>23 h | 4.5                                            | C <sub>14</sub> H <sub>22</sub> O                | 13.18                               | aromatic ketone                | aromatic           |
|               | 1.5                                            | C <sub>16</sub> H <sub>32</sub> O <sub>2</sub>   | 7.03                                | saturated fatty acids          | lipid-like         |
|               | 1.5                                            | C <sub>12</sub> H <sub>24</sub> O <sub>2</sub>   | 5.83                                | lauric acid                    | aliphatic          |
|               | 1.5                                            | C <sub>18</sub> H <sub>36</sub> O <sub>2</sub>   | 5.26                                | saturated fatty acids          | lipid-like         |
|               | 0.5                                            | C <sub>12</sub> H <sub>26</sub> O <sub>4</sub> S | 3.37                                | alkyl organosulfate            | aliphatic          |
|               | 2.5                                            | C <sub>18</sub> H <sub>34</sub> O <sub>3</sub>   | 2.99                                | unsaturated fatty acid         | lipid-like         |
|               | 0.5                                            | C <sub>16</sub> H <sub>35</sub> NO <sub>2</sub>  | 2.15                                | fatty acid amide               | lipid-like         |
|               | 7.5                                            | C <sub>28</sub> H <sub>44</sub> O <sub>2</sub>   | 1.81                                | ergosterol peroxide            | lipid-like         |
|               | 4.5                                            | C <sub>15</sub> H <sub>24</sub> O <sub>3</sub>   | 1.48                                | sesquiterpenic acid            | lipid-like         |
|               | 0.5                                            | C <sub>14</sub> H <sub>30</sub> O <sub>5</sub> S | 1.32                                | hydroxyl organosulfate         | lipid-like         |

In conclusion, we have thoroughly revised the manuscript. In particular, some figures have been improved for clarity and presentation, and the manuscript has been

carefully edited to refine the language and correct grammatical issues. We sincerely appreciate your consideration of our revised submission.
